# Supplementary material
Source: Royal Society of Chemistry journal article supplement (doi:10.1039/d6ta02010k)
Supplement: d6ta02010k1.pdf [file d6ta02010k1.pdf]

## Intercalation Mechanism of C<sub>2</sub>N/Blue Phosphorene for Li-Ion Batteries: Ultrahigh Capacity, Fast Kinetics and Improved Compatibility with FSI/FEC Electrolytes

Majid EL Kassaoui<sup>1,\*</sup>, Soukaina Khaouti<sup>2</sup>, Mohamed Adarmouch<sup>2</sup>, Mehwish Khalid Butt<sup>4</sup>,  
Omar Mounkachi<sup>1,2</sup>

<sup>1</sup>College of computing, Mohammed VI Polytechnic University, Lot 660, Hay Moulay Rachid Ben Guerir, 43150, Morocco

<sup>2</sup>Laboratory of Condensed Matter and Interdisciplinary Sciences, Faculty of Sciences, Mohammed V University in Rabat, Morocco

<sup>3</sup>Frontiers Science Center for Flexible Electronics, Northwestern Polytechnical University, Xian, 710072, PR China

\* Corresponding author: E-mail address: [Majid.ELKASSAOUI-EXT@um6p.ma](mailto:Majid.ELKASSAOUI-EXT@um6p.ma)

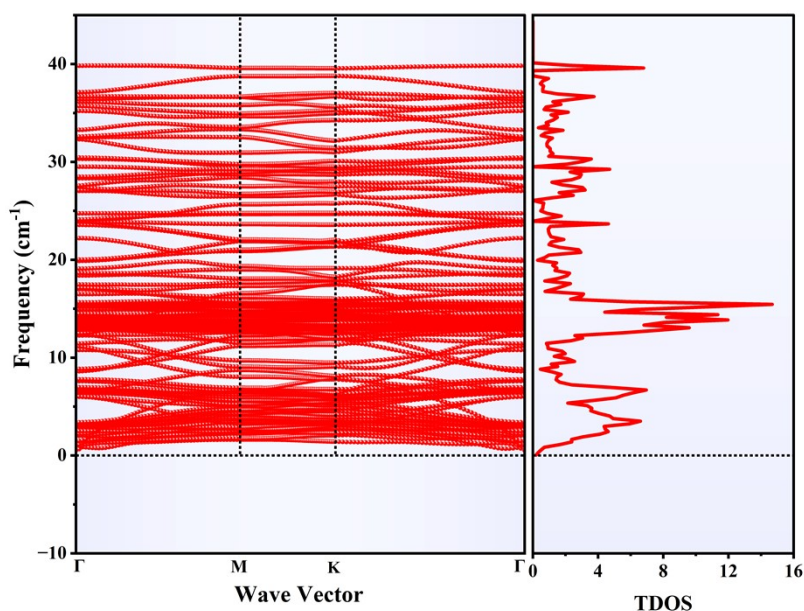

**Figure S1.** Computed phonon dispersion spectrum (Band&DOS) of the C<sub>2</sub>N/BlueP heterostructure along the high-symmetry paths in the Brillouin zone.

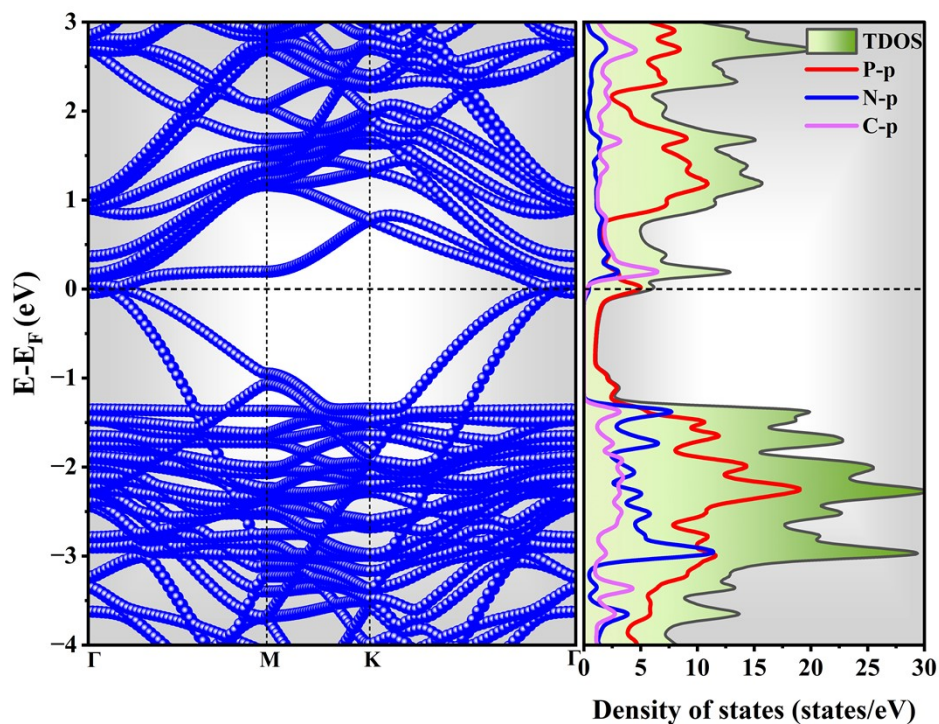

**Figure S2.** Band structure and total and partial electronic DOSs of the  $C_2N/BlueP$  heterostructure calculated using the GGA-PBE functional.

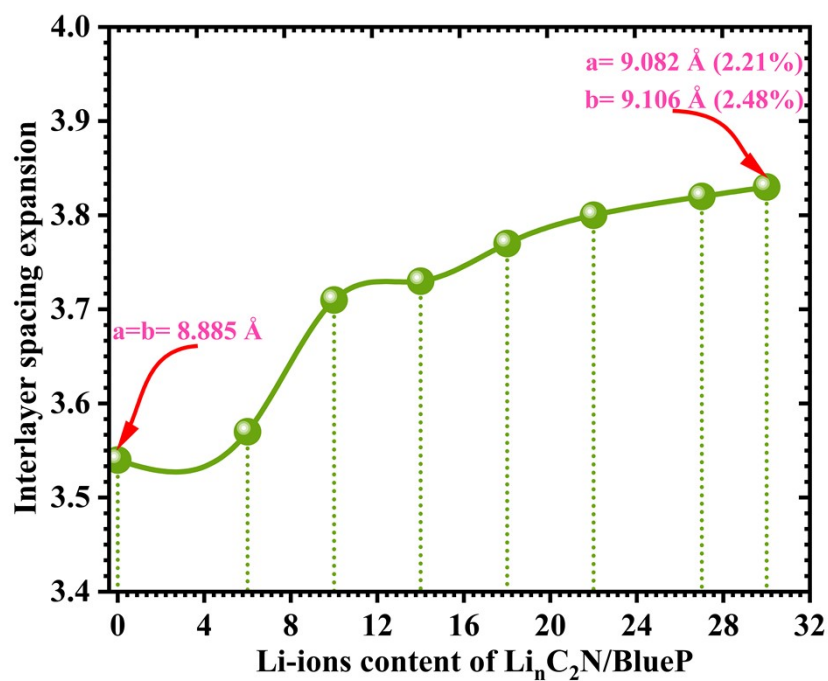

**Figure S3.** Interlayer spacing expansion during Li intercalation and the percentage of structural deformation in the in-plane lattice parameters.

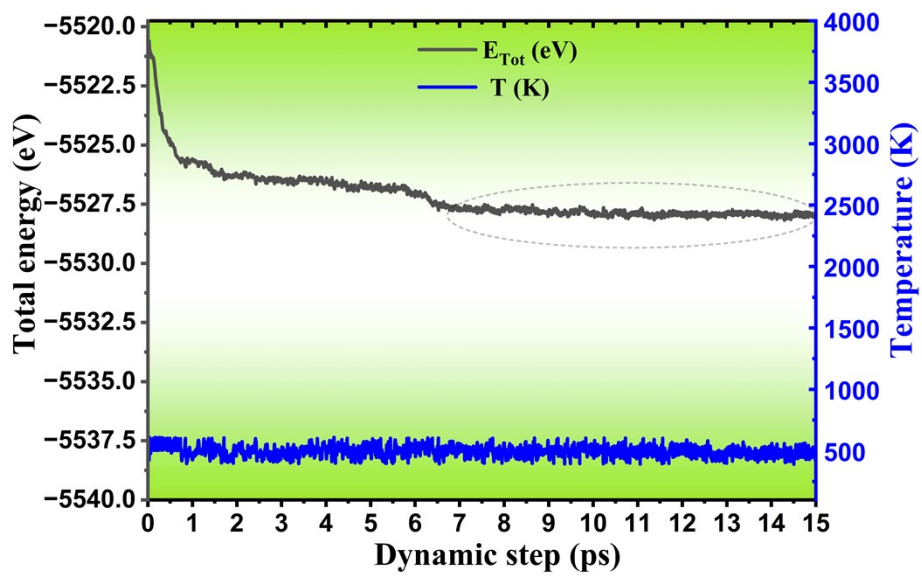

**Figure S4.** Temporal evolution of total energy and temperature for the fully lithiated C<sub>2</sub>N/BlueP structure obtained from a 15 ps AIMD simulation at 500 K.

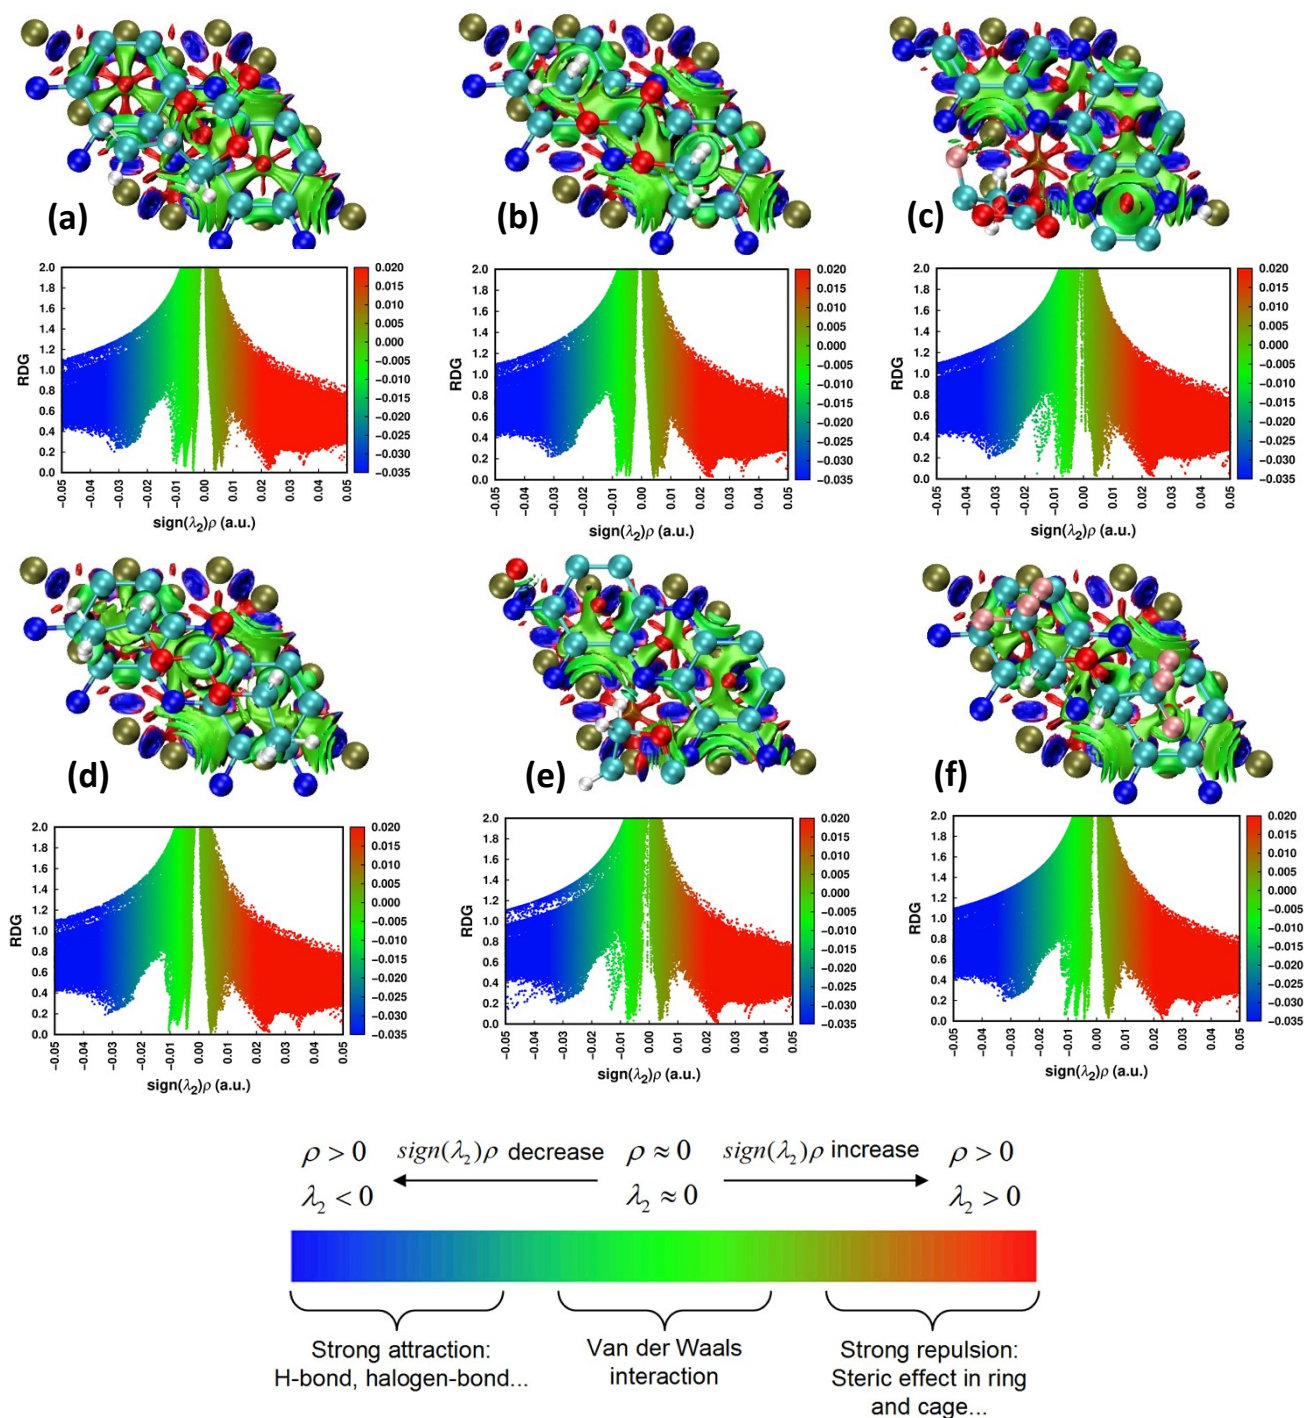

**Figure S5.** RDG isosurfaces and corresponding  $\text{sign}(\lambda_2)\rho$  plots for solvent adsorption on the anode: (a) BTFE, (b) DEC, (c) DMC, (d) EC, (e) FEC, and (f) PC solvent interactions with the anode.
